# Supplementary material
Source: ML conference proceedings conference paper supplement (https://openreview.net/forum?id=Igm9bbkzHC)

Generalization Confusion Matrices (gemma-7b-bnb-4bit)

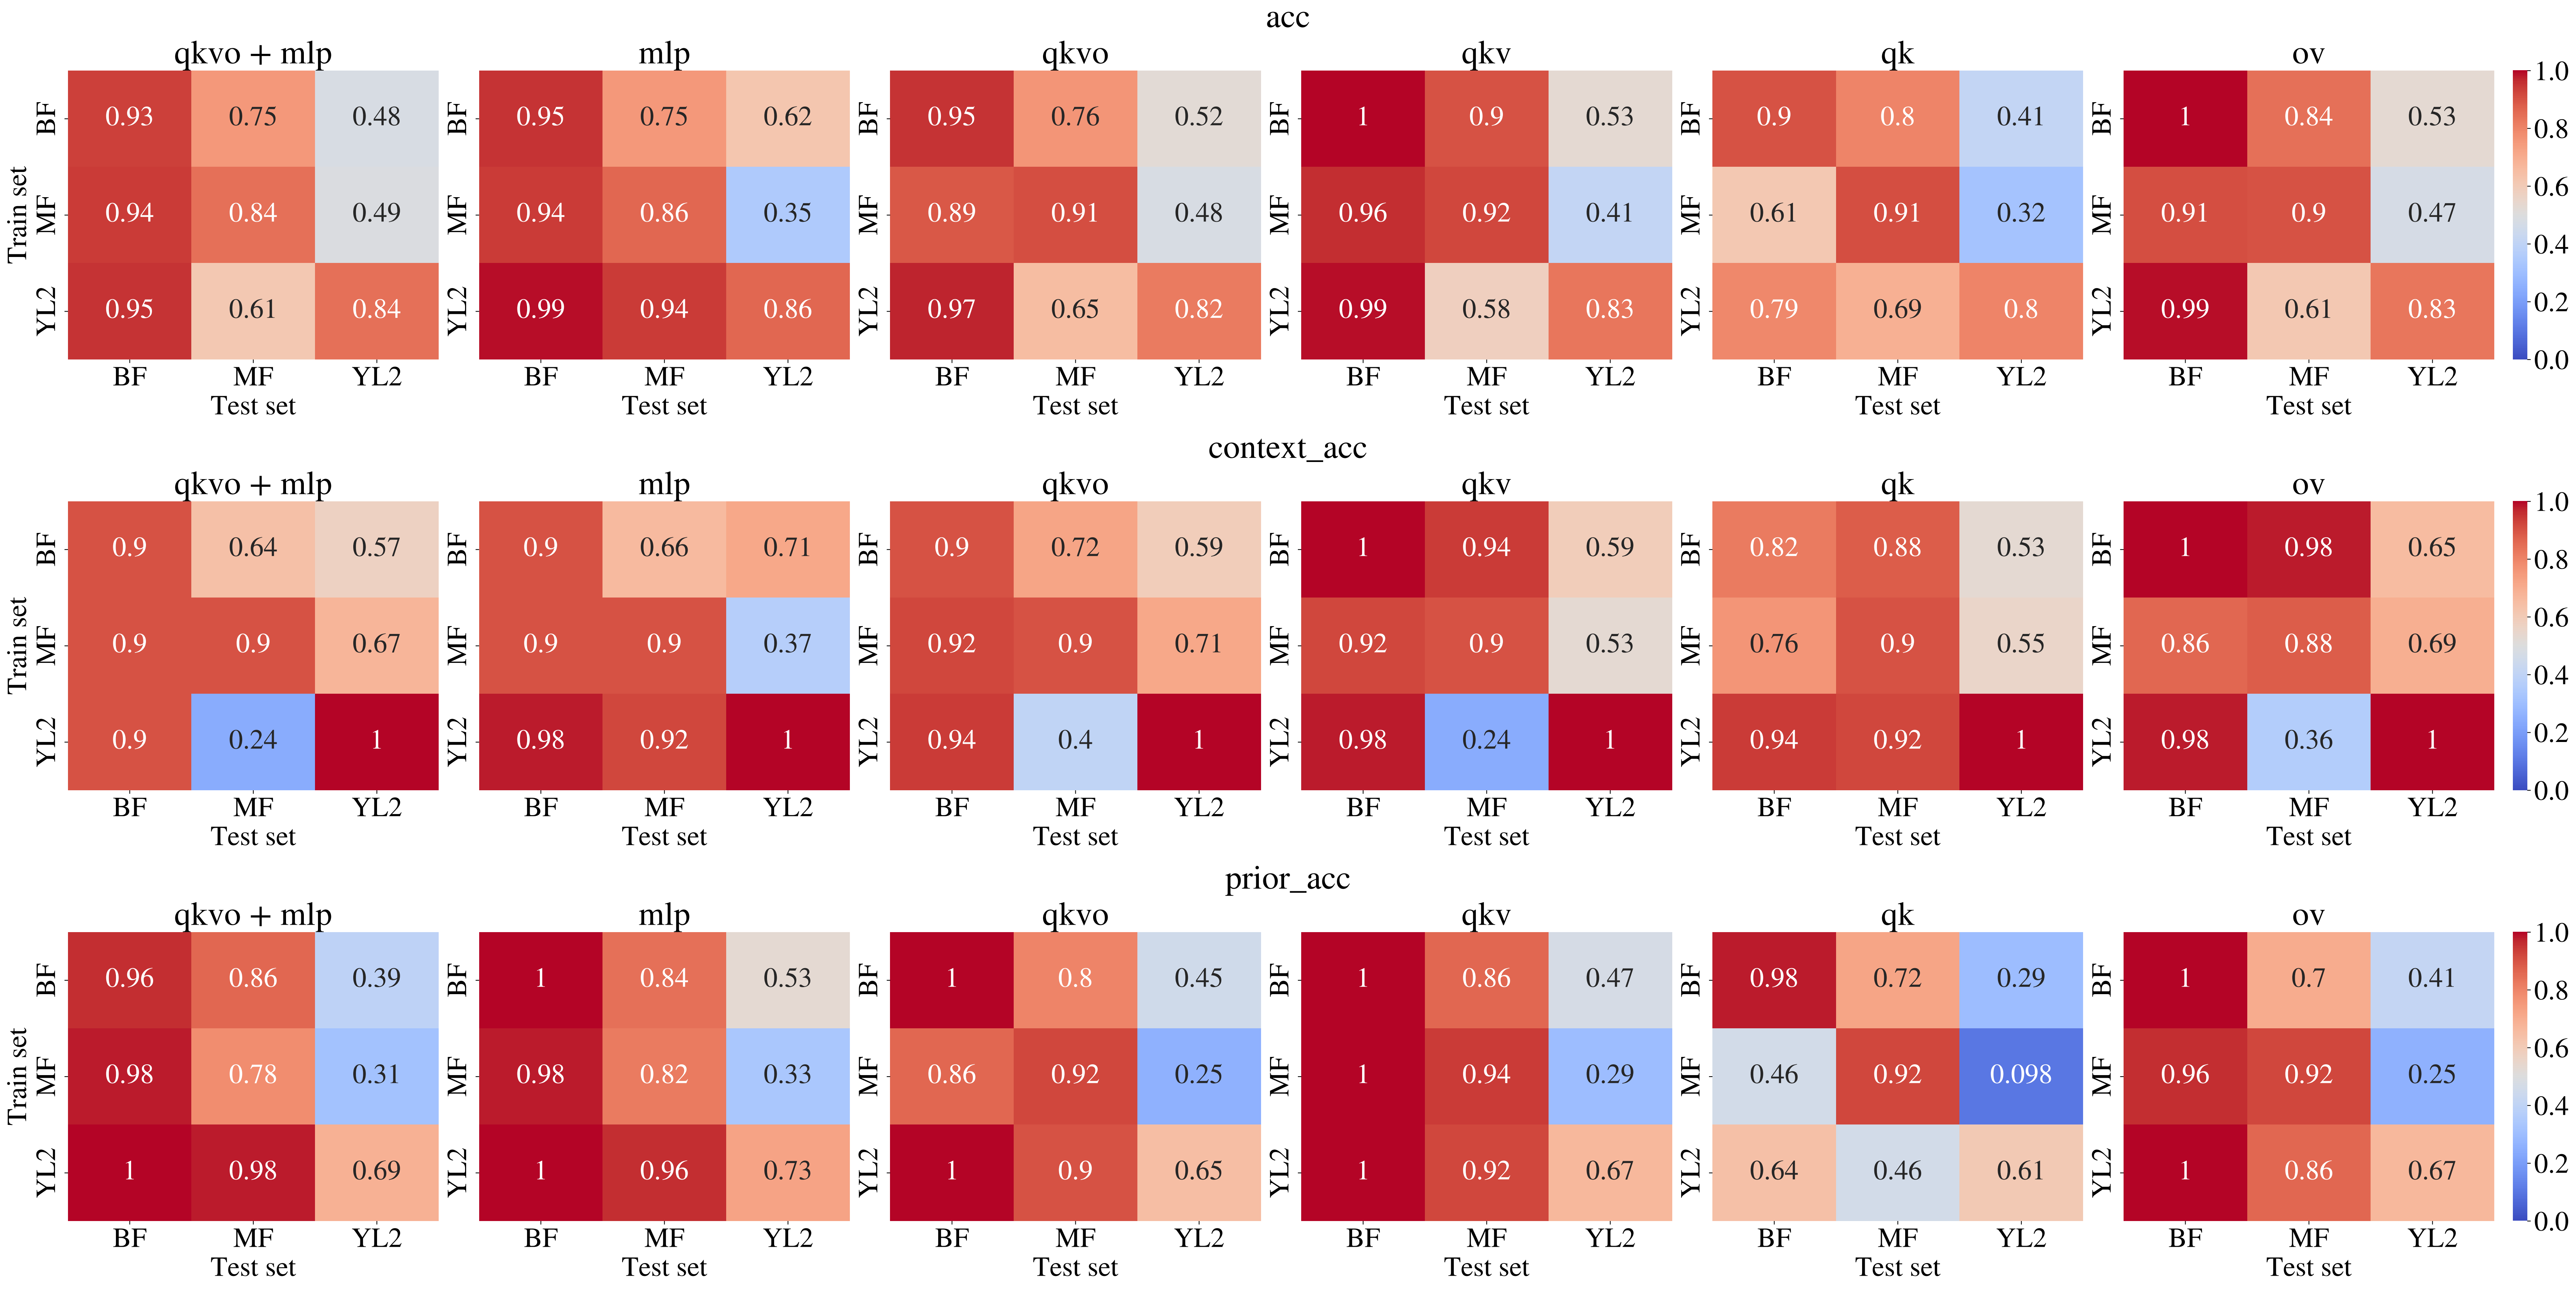

Supplement: supplementary_material [file attachment]

Generalization Confusion Matrices (llama-2-7b-chat-bnb-4bit)

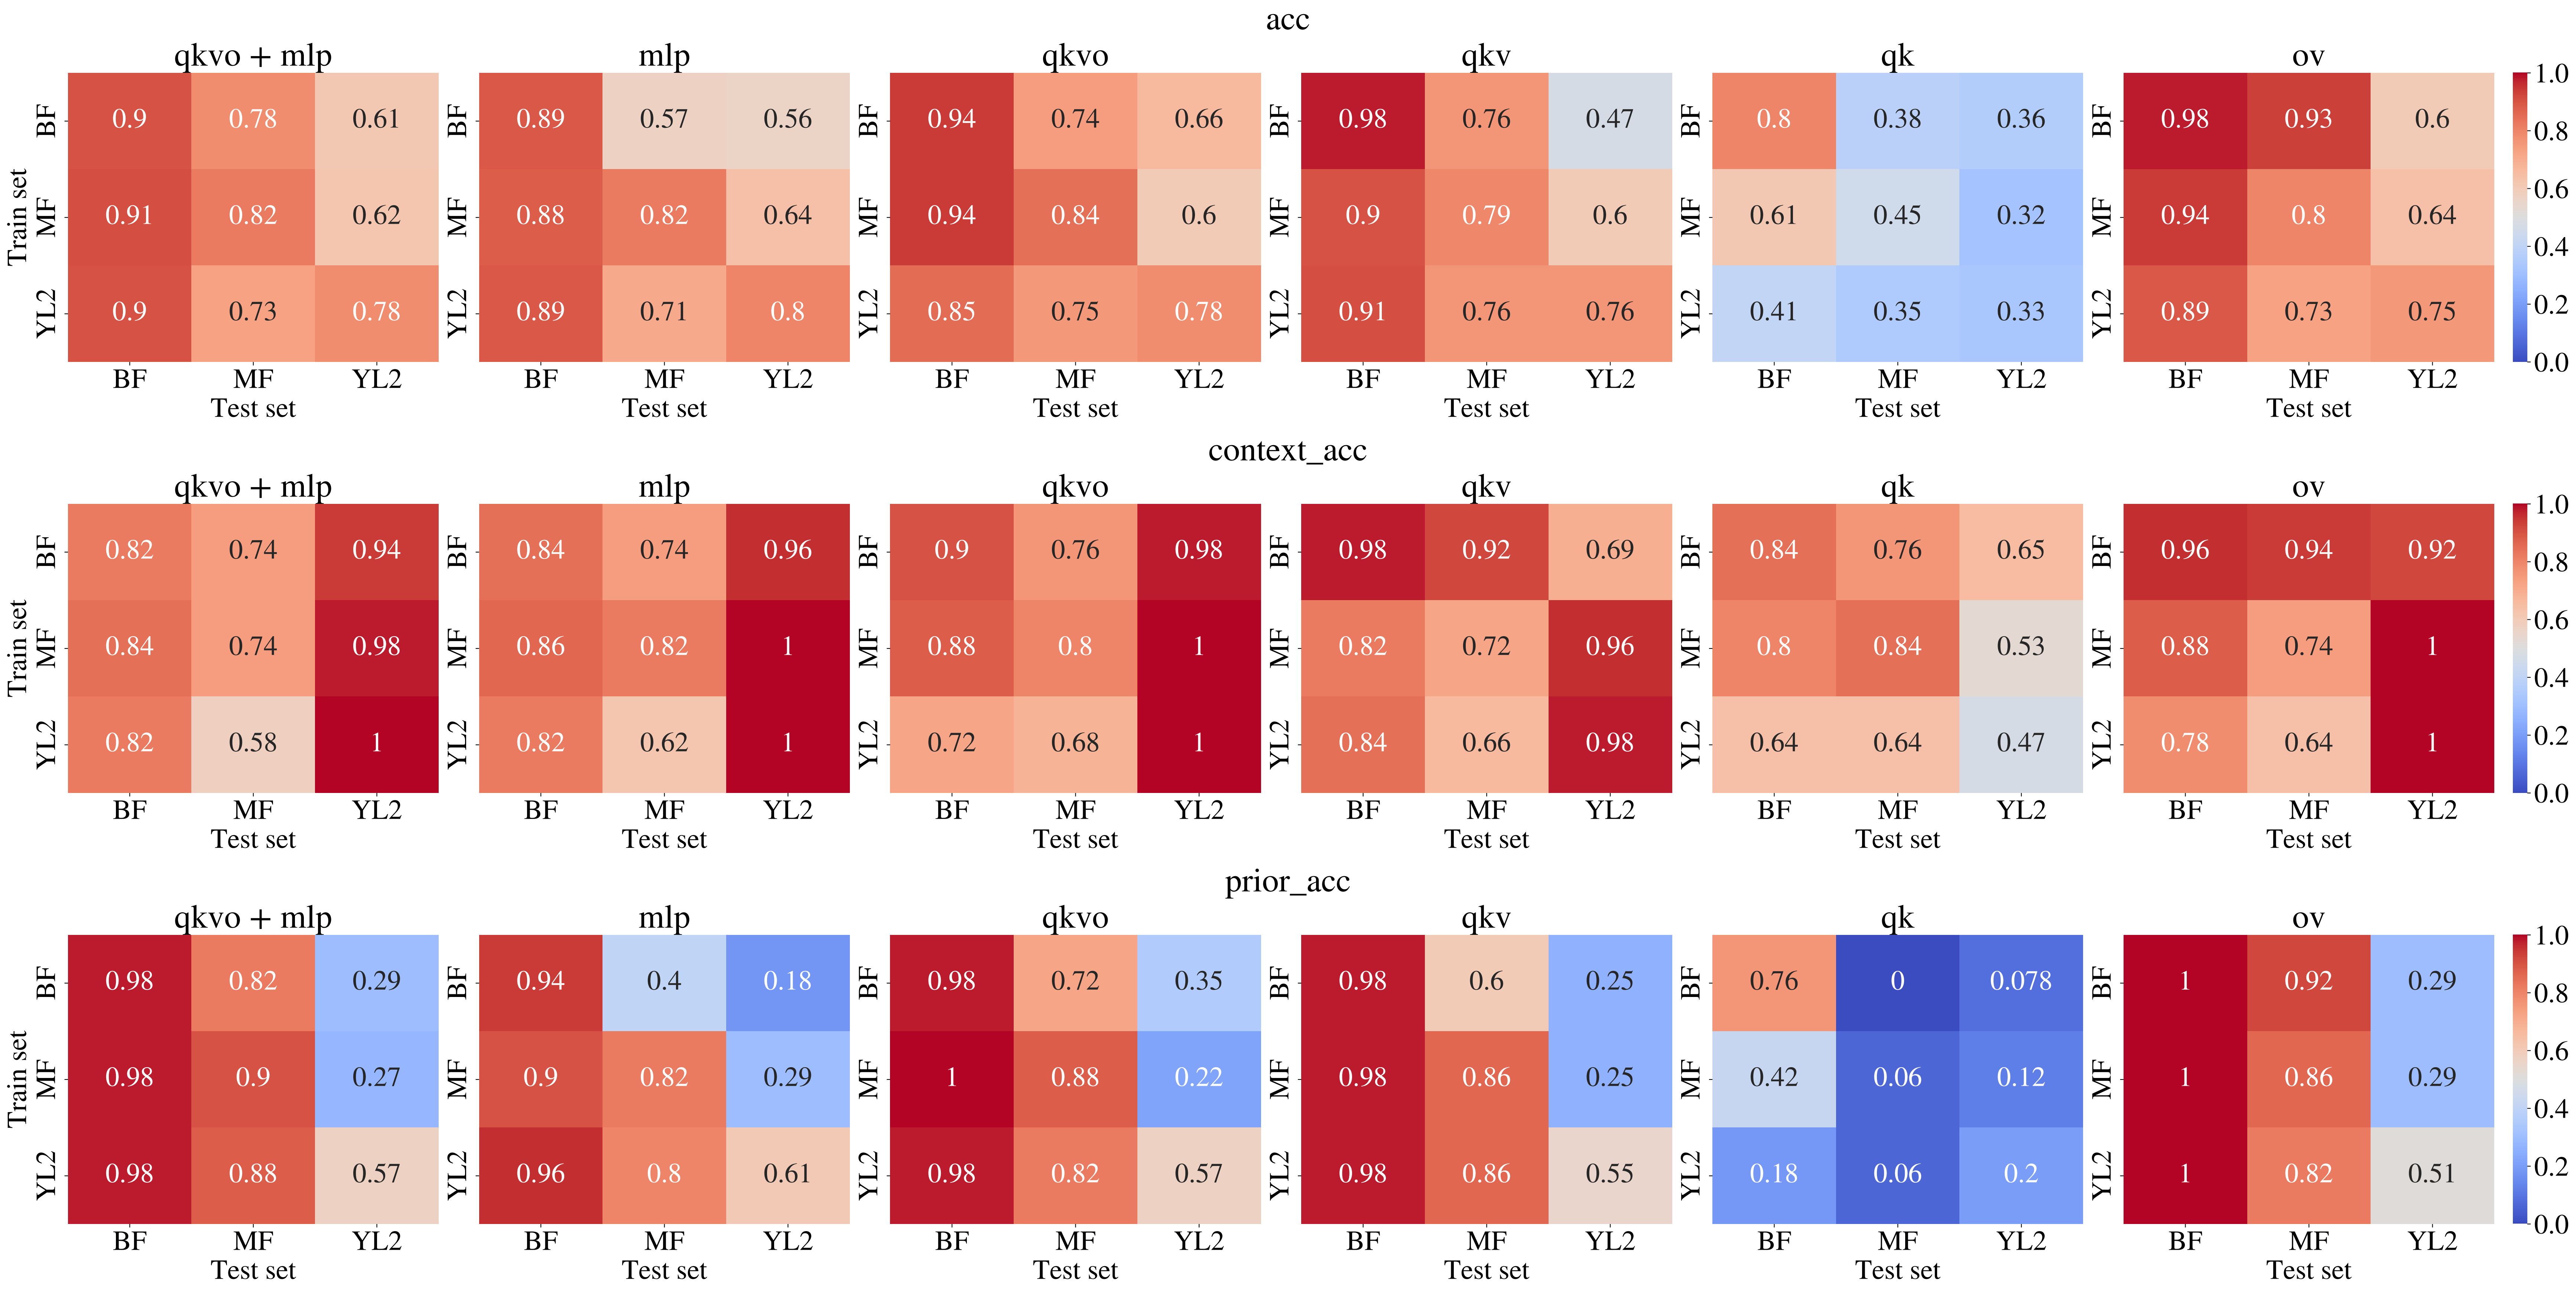

Supplement: supplementary_material [file attachment]

Generalization Confusion Matrices (mistral-7b-v0.2-bnb-4bit)

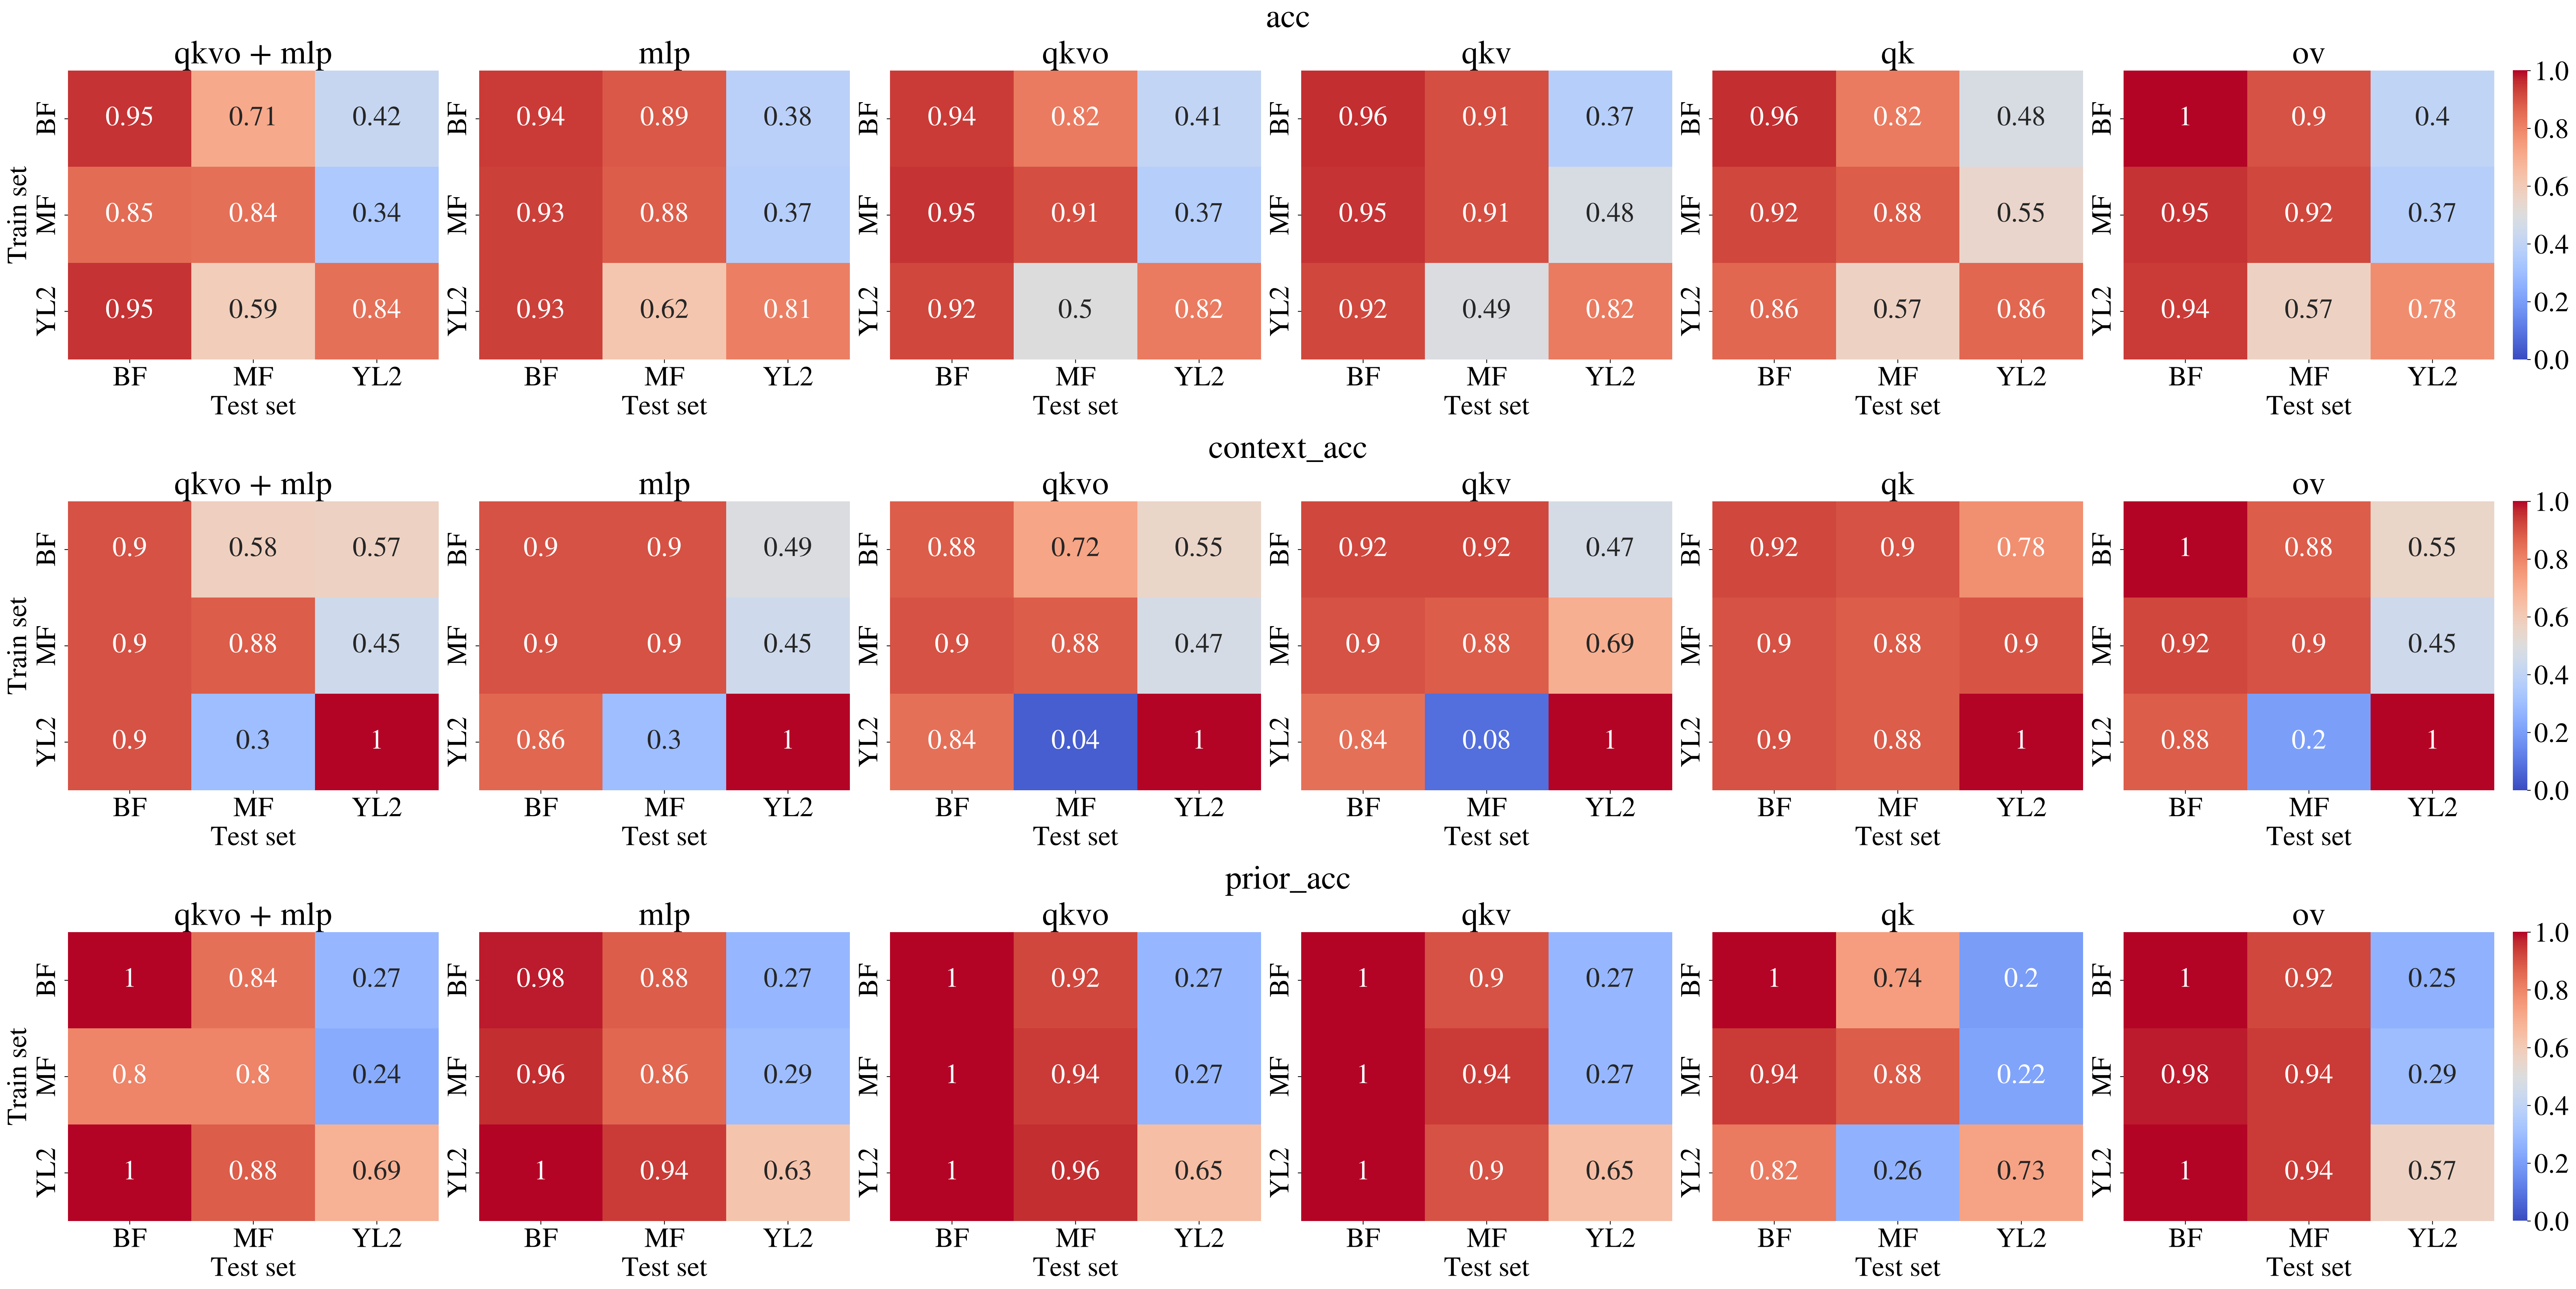

Supplement: supplementary_material [file attachment]
